# Supplementary material
Source: PubMed Central journal article supplement (PMC8091618)
Supplement: AEM.02343-20-s0001.pdf [file AEM.02343-20-s0001.pdf]

1 Title: Screening and Genetic Characterization of Locus of Heat Resistance (LHR) in  
2 meat-borne *E. coli*

3 Running Title: Extreme Heat Resistance in US Red meat

4 Manita Guragain, Dayna M. Brichta-Harhay, James L. Bono, and Joseph M. Bosilevac<sup>#</sup>

5 U.S. Department of Agriculture, Agricultural Research Service, Roman L. Hruska U.S.

6 Meat Animal Research Center, Clay Center, Nebraska 68933, USA

7 <sup>#</sup>Corresponding author

8 Tel: 402-763-4225; Fax: 402-762-4149; E-mail: [mick.bosilevac@usda.gov](mailto:mick.bosilevac@usda.gov)

9

10

11

12 **TableS1. Percentage<sup>a</sup> of pathotypes<sup>b</sup> amongst *E. coli* originating from different**  
 13 **meat animal systems.**

|               | EHEC | STEC | EPEC | EC   |
|---------------|------|------|------|------|
| Beef (n=1548) | 8.9  | 41.9 | 7.6  | 41.7 |
| Veal (n=994)  | 38.6 | 5.3  | 35.4 | 20.6 |
| Sheep (n=511) | 9.2  | 90.2 | 0.2  | 0.4  |
| Pork (n=1070) | 1.3  | 30.7 | 15.8 | 52.1 |

14 <sup>a</sup>Percentage is presented for each pathotype of isolates across each animal system in a  
 15 row.

16 <sup>b</sup> Types of *E. coli*: Enterohaemorrhagic *E. coli* (EHEC; *stx*<sup>+</sup> *eae*<sup>+</sup>), Shiga toxicogenic *E. coli*  
 17 (STEC; *stx*<sup>+</sup> *eae*<sup>-</sup>), Enteropathogenic *E. coli* (EPEC; *stx*<sup>-</sup> *eae*<sup>+</sup>), and non-pathogen  
 18 background *E. coli* (EC).

19

20

21 **Table S2. Genotypes of LHR positive pathotypic *E. coli***

| Isolate       | Number of LHR bands <sup>a</sup> | ClpK2 <sup>b</sup> | Heat resistance <sup>c</sup> | Virulence genes <sup>d</sup> | Pathotype <sup>e</sup> |
|---------------|----------------------------------|--------------------|------------------------------|------------------------------|------------------------|
| Sheep1271-PO4 | 4                                | 0                  | -                            | <i>stx1, stx2</i>            | STEC                   |
| Beef 190.1    | 3                                | 0                  | -                            | <i>stx2, hlyA</i>            | STEC                   |
| Beef 579.1    | 4                                | 0                  | -                            | <i>stx1, stx2, hlyA</i>      | STEC                   |

22

23 <sup>a</sup>LHR bands refers to amplicons produced from four-plex PCR that detected 5'-, 3'-, and  
24 two internal regions of the 14-15Kb LHR.

25 <sup>b</sup>ClpK2 identified by PCR targeting ClpK2 gene in second variant of LHR.

26 <sup>c</sup>Heat resistance was determined by growth after exposure to 60°C for 20minutes.

27 <sup>d</sup>Virulence genes identified were Shiga toxins 1 and 2 (*stx1, stx2*), intimin (*eae*), and the  
28 enterohemlytic hemolysin (*hlyA*).

29 <sup>e</sup>Pathotypes: Enterohemorrhagic *E. coli* (EHEC; *stx*<sup>+</sup> *eae*<sup>+</sup>), Shiga toxigenic *E. coli* (STEC;  
30 *stx*<sup>+</sup> *eae*<sup>-</sup>), Enteropathogenic *E. coli* (EPEC; *stx*<sup>-</sup> *eae*<sup>+</sup>).
